# Supplementary material for: Underwater determination of calcium and strontium ions in oilfield produced water by laser-induced breakdown spectroscopy (LIBS)
Source: Royal Society of Chemistry journal article supplement (doi:10.1039/d3ay01457f), 2023-01-01
Supplement: d3ay01457f1.pdf [file d3ay01457f1.pdf]

## Electronic Supplementary Information

### **Underwater determination of calcium and strontium as scaling ions in oilfield produced water by Laser-Induced Breakdown Spectroscopy (LIBS)**

Nilvan A. Silva and Ivo M. Raimundo Jr.\*

Institute of Chemistry, UNICAMP, PO Box 6154, 13083-970, Campinas, Brazil

E-mail address: [ivo@unicamp.br](mailto:ivo@unicamp.br)

Phone: (+55) 19 3521-3136

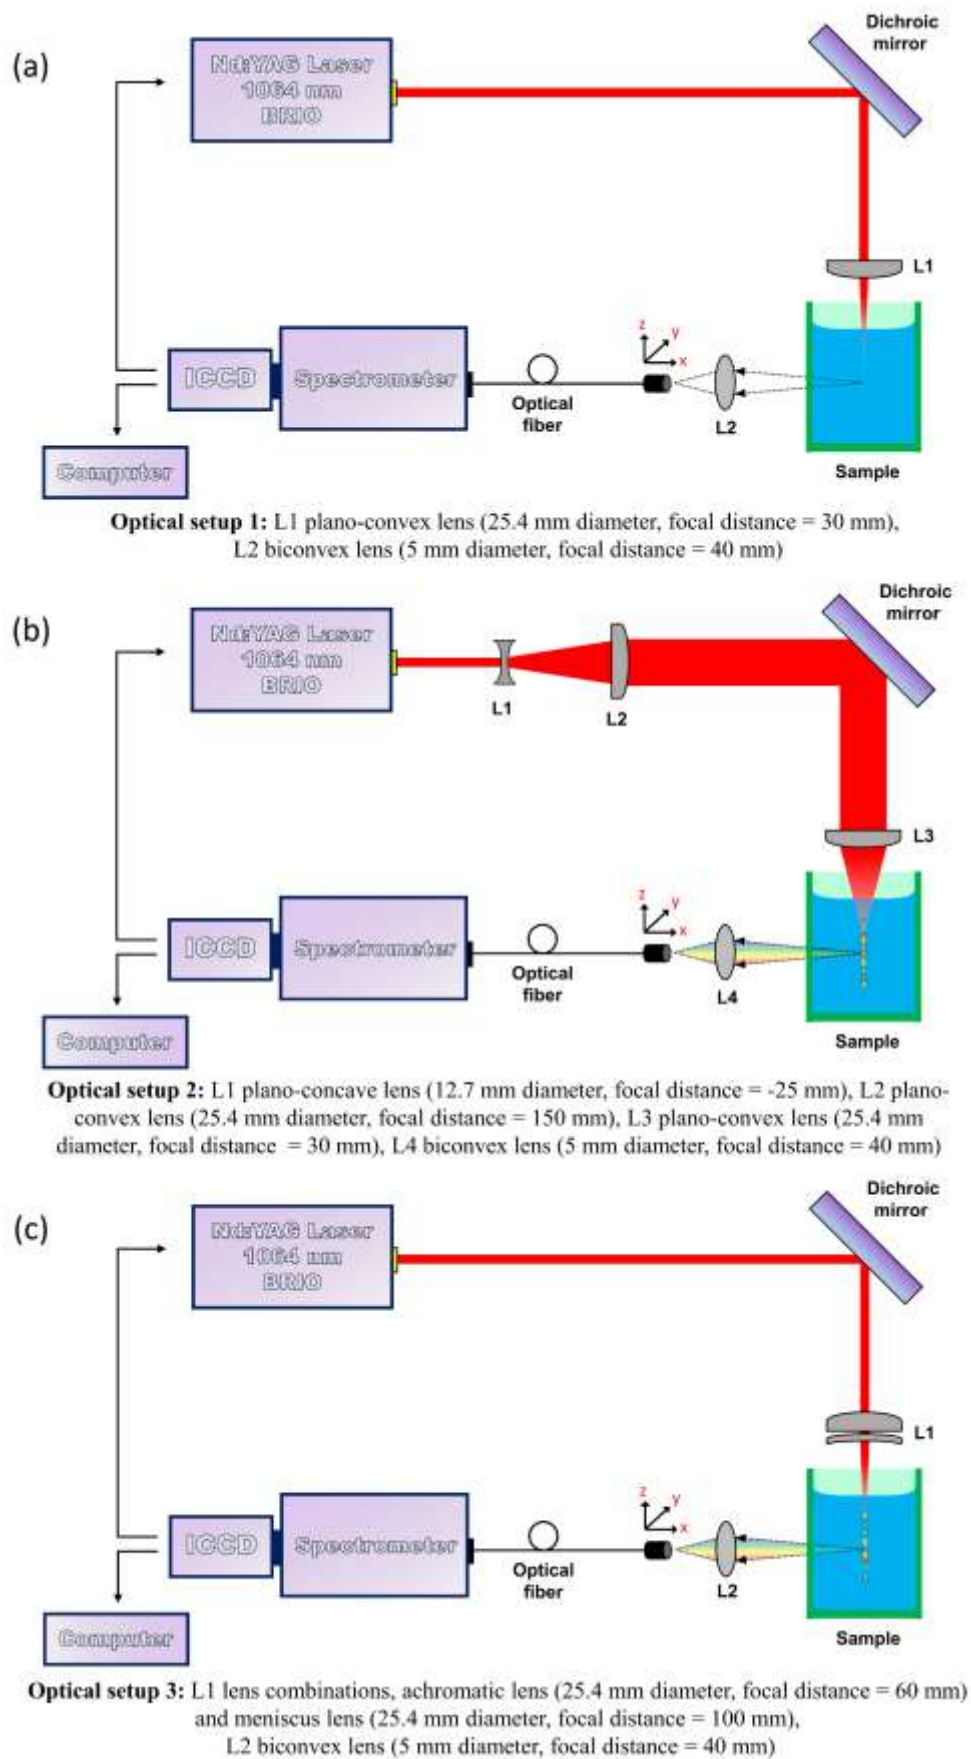

**Fig. S1** Schematic diagram of the different optical setups for underwater measurements: setup 1 (a), setup 2 (b) and setup 3 (c).

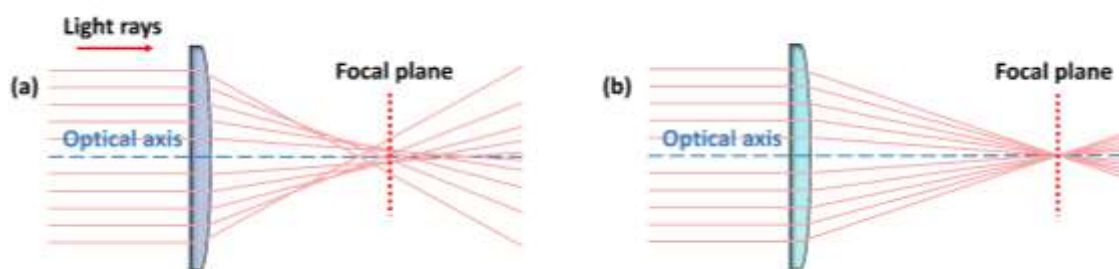

**Fig. S2** lens with spherical aberration (a) and lens without spherical aberration (b).

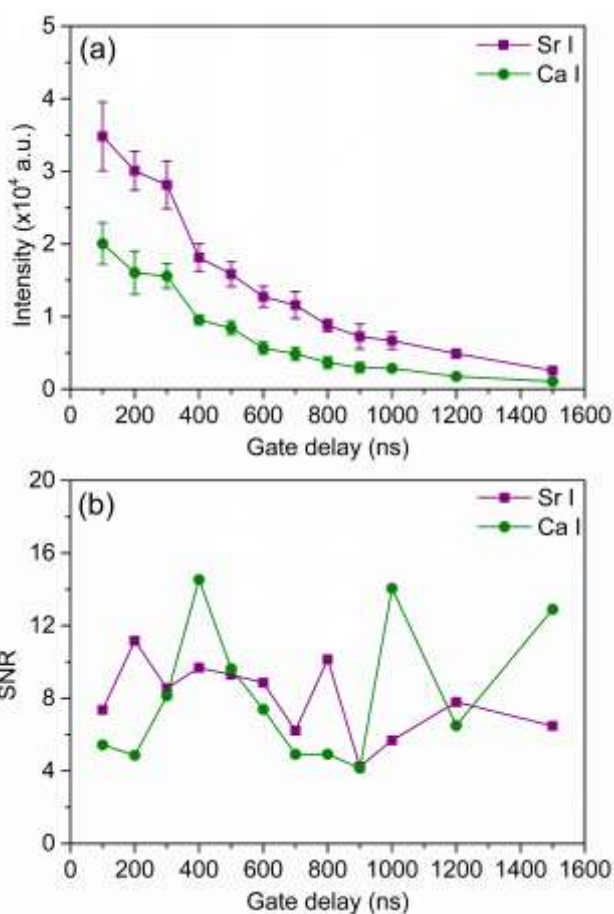

**Fig. S3** Emission intensity (a) and SNR values (b) as a function of the gate delay (laser pulse energy: 25 mJ, gate width: 3.0  $\mu$ s, integration of 100 laser pulses, repetition rate: 10 Hz, 200 mg L<sup>-1</sup> Ca(II) and 400 mg L<sup>-1</sup> Sr(II), n = 5).

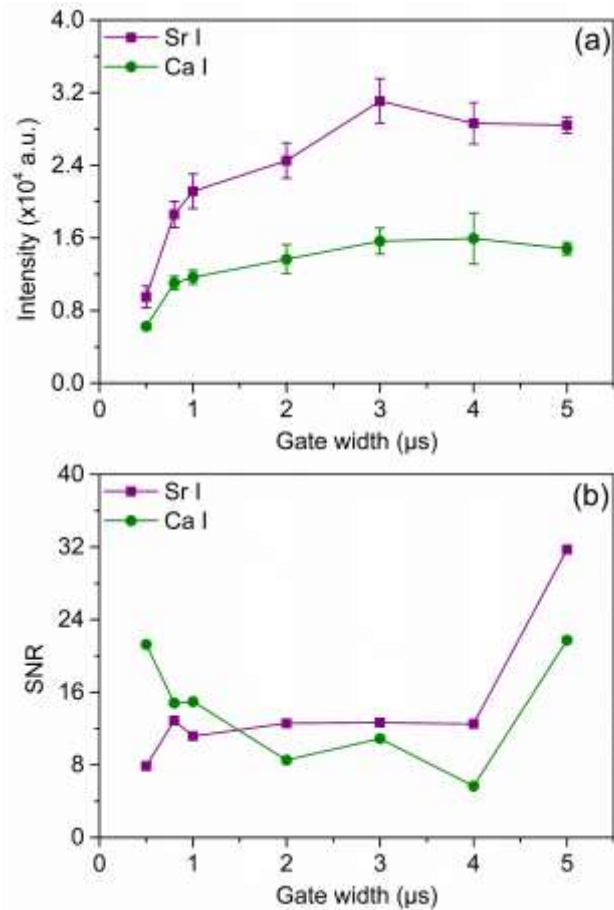

**Fig. S4** Emission intensity (a) and SNR values (b) as a function of the gate width (laser pulse energy: 31 mJ, gate delay: 300 ns, integration of 100 laser pulses, repetition rate: 10 Hz, 200 mg L<sup>-1</sup> Ca(II) and 400 mg L<sup>-1</sup> Sr(II), n = 5).

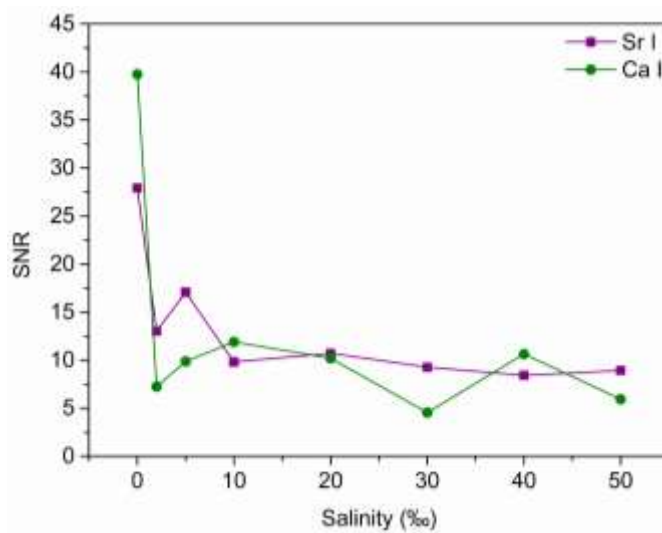

**Fig. S5** Effect of salinity on SNR values (laser pulse energy: 31 mJ, gate delay: 300 ns, gate width: 5.0  $\mu\text{s}$ , integration of 100 laser pulses, repetition rate: 10 Hz, 200 mg L<sup>-1</sup> Ca(II) and 400 mg L<sup>-1</sup> Sr(II), n = 5).

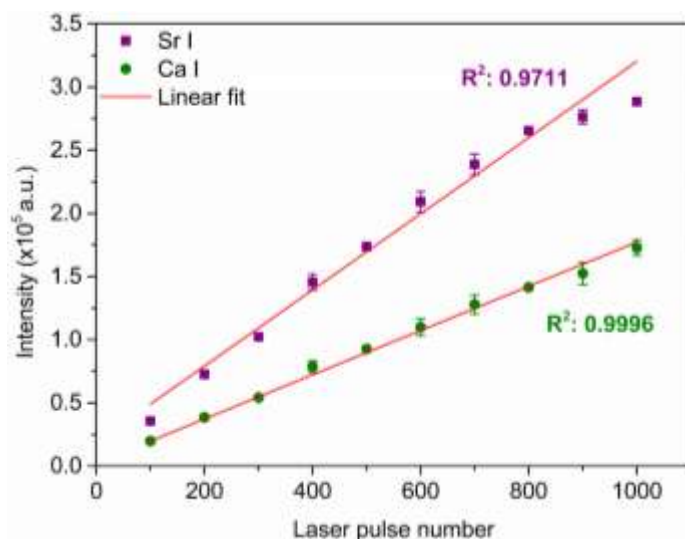

**Fig. S6** Emission intensity as a function of the number of laser pulses employed in a single measurement (laser pulse energy: 31 mJ, gate delay: 300 ns, gate width: 5.0  $\mu$ s, repetition rate: 10 Hz, 200 mg L<sup>-1</sup> Ca(II) and 400 mg L<sup>-1</sup> Sr(II), n = 5).

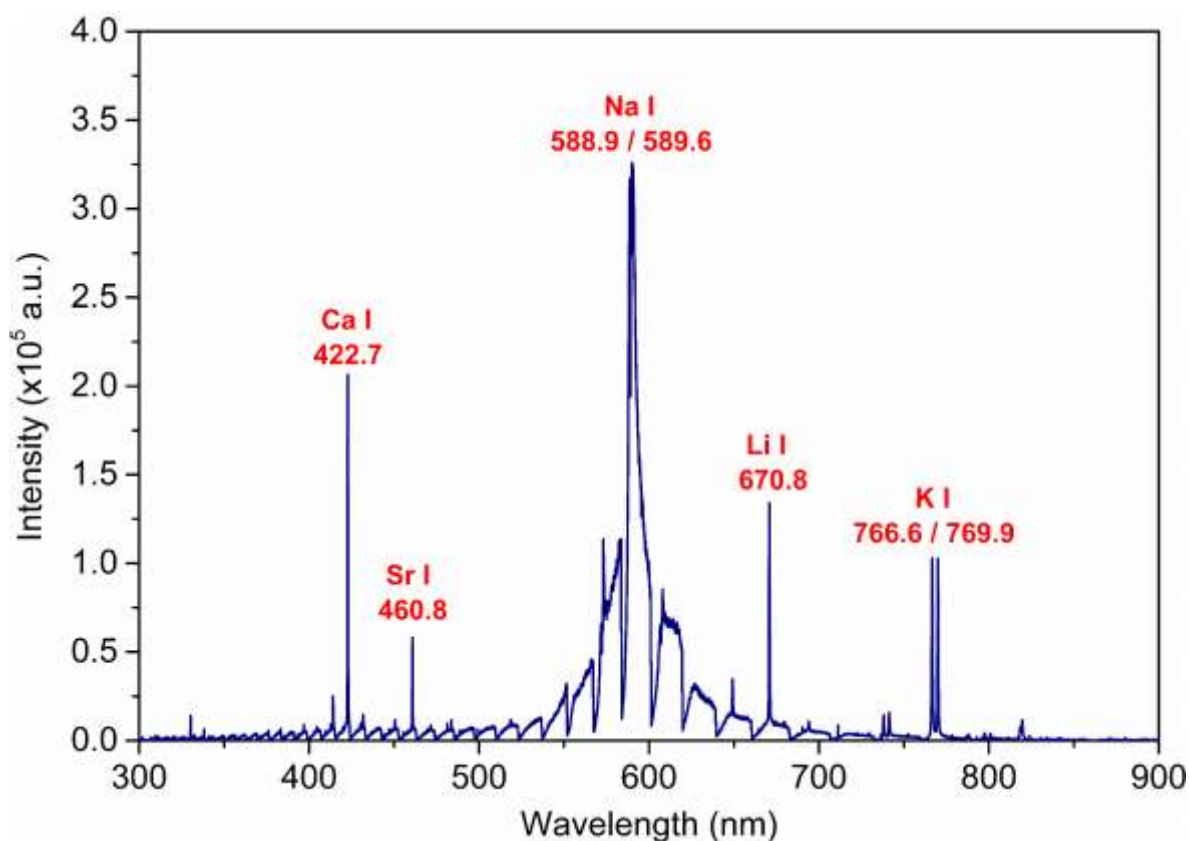

**Fig. S7** LIBS spectrum of produced water sample (laser pulse energy: 31 mJ, gate delay: 300 ns, gate width: 5.0  $\mu$ s, integration of 500 laser pulses, repetition rate: 10 Hz, average of five spectra).
